# Supplementary material
Source: PubMed Central journal article supplement (PMC4256867)
Supplement: supp_pp.114.250340_250340Figure_S1.pdf [file supp_pp.114.250340_250340Figure_S1.pdf]

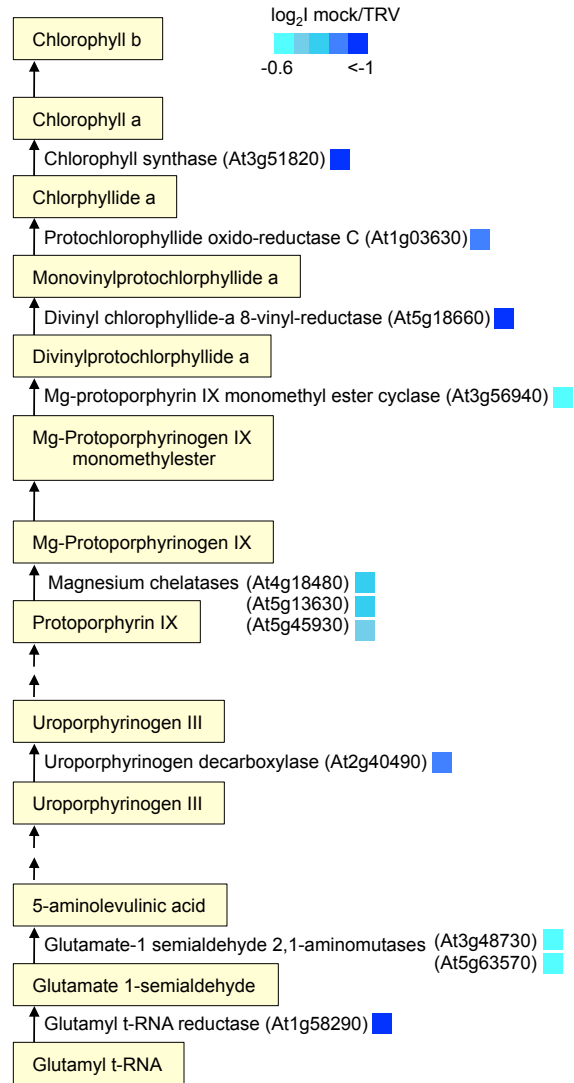

**Supplemental Figure S1.** MapMan illustration of microarray data showing changes in the expression of genes involved in the tetrapyrrole biosynthetic pathway. The values represent the fold changes from microarray expression data.
