# Supplementary material
Source: PubMed Central journal article supplement (PMC4256867)
Supplement: supp_pp.114.250340_250340Figure_S2.pdf [file supp_pp.114.250340_250340Figure_S2.pdf]

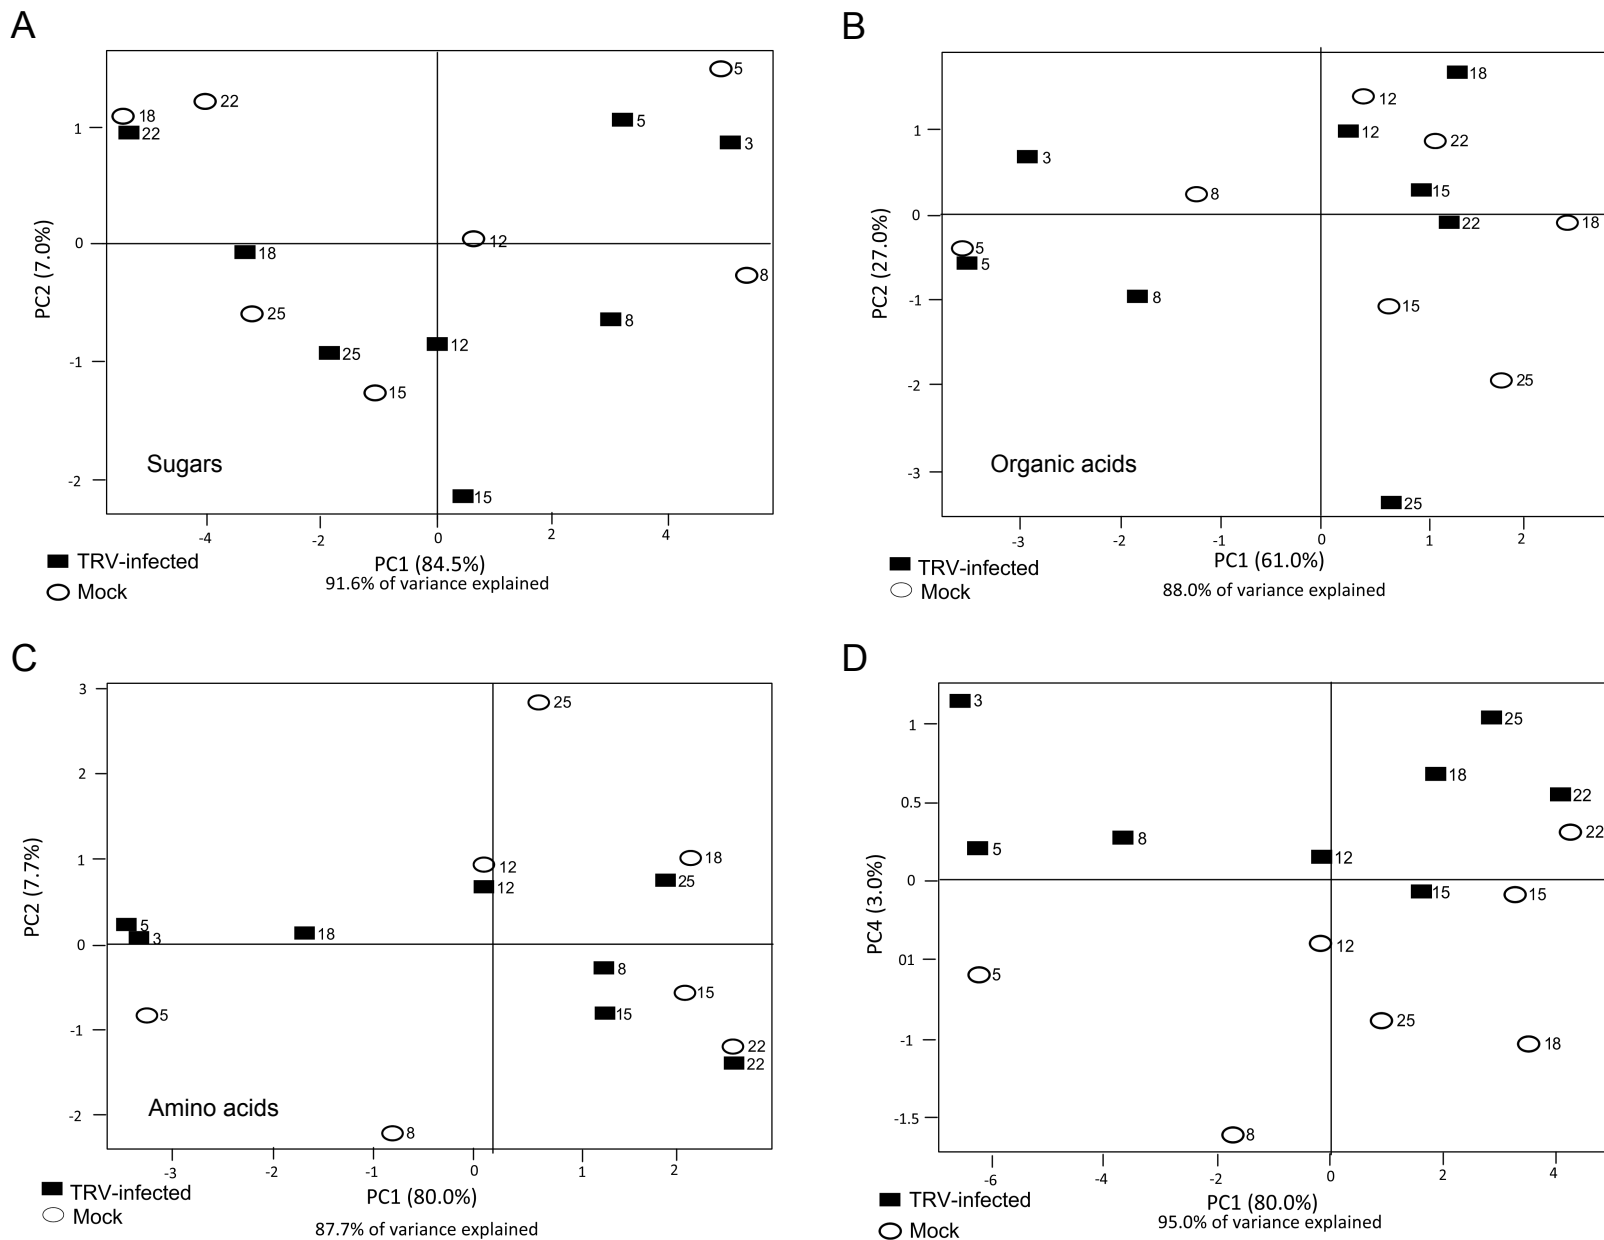

**Supplemental Figure S2.** Principal component analysis using metabolic profiling data from sugars (A), organic acids (B) and amino acids (C and D) detected by gas chromatography–mass spectrometry (GC-MS). Leaf samples were collected at different time points from mock-inoculated (○) and TRV-infected (■) *Arabidopsis* plants. The numbers indicate the days after mock and TRV inoculation. The variance explained by each component (%) is given within parentheses.
