# Supplementary material
Source: PubMed Central journal article supplement (PMC4256867)
Supplement: supp_pp.114.250340_250340Figure_S4.pdf [file supp_pp.114.250340_250340Figure_S4.pdf]

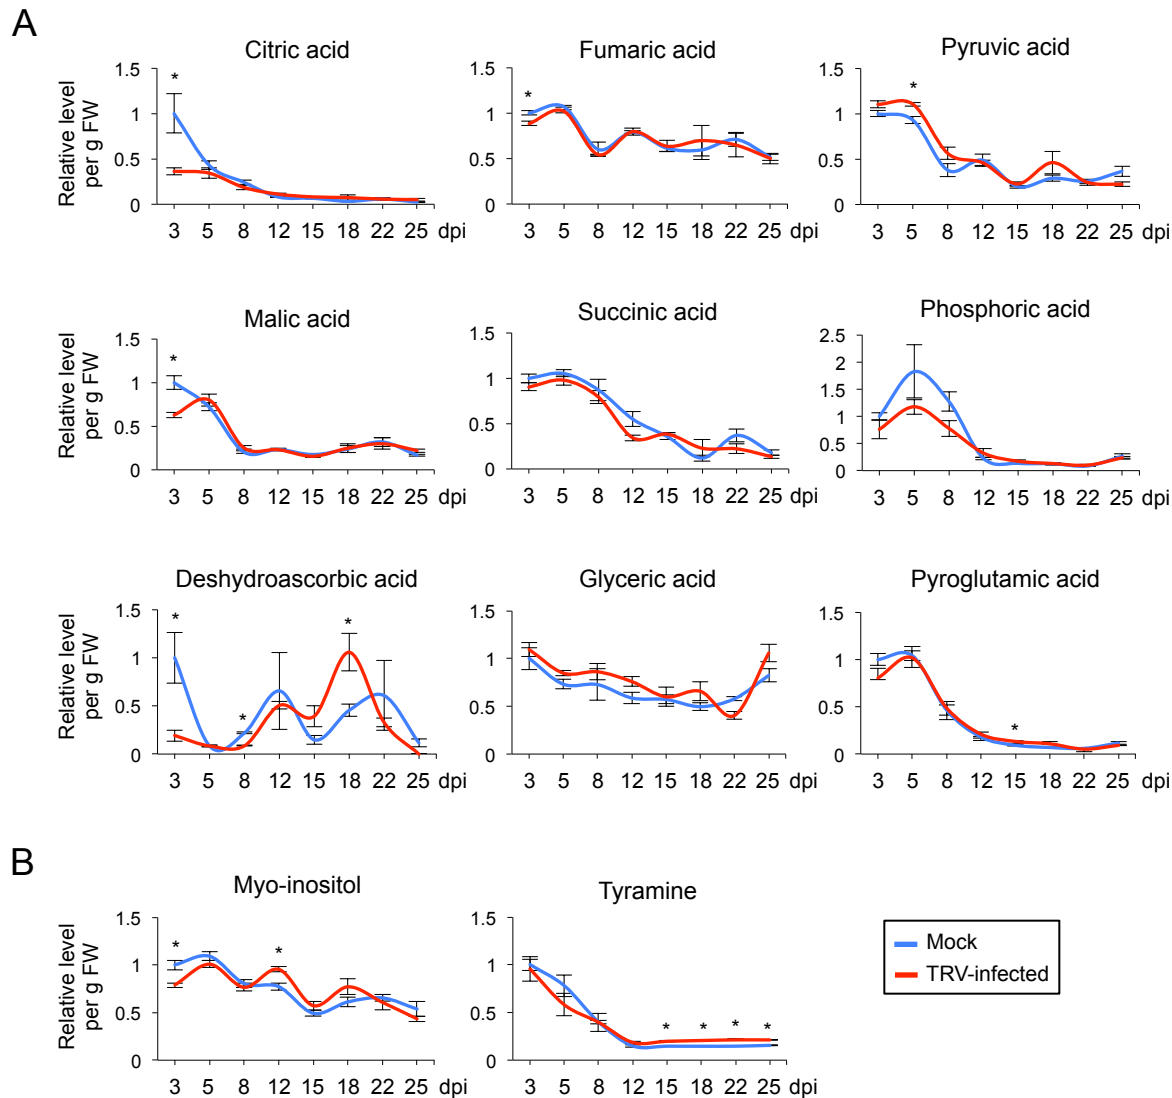

**Supplemental Figure S4.** Time-course accumulation of organic acids in mock-inoculated and TRV-infected *Arabidopsis*. The content of organic acids (A) and other metabolites (B) was quantified by GC-MS on TRV-infected (red) and mock-inoculated (blue) leaves. Relative amounts were calculated relative to the mock-inoculated controls at 3 days post-inoculation (dpi) that were arbitrarily set at 1. Data are means  $\pm$  SD from 4 independent biological replicates. Asterisks indicate statistical significance versus the mock-inoculated controls (Student's *t* test,  $P < 0.05$ ). Grams of fresh weight (g FW).
