# Supplementary material
Source: PubMed Central journal article supplement (PMC4256867)
Supplement: supp_pp.114.250340_250340Figure_S5.pdf [file supp_pp.114.250340_250340Figure_S5.pdf]

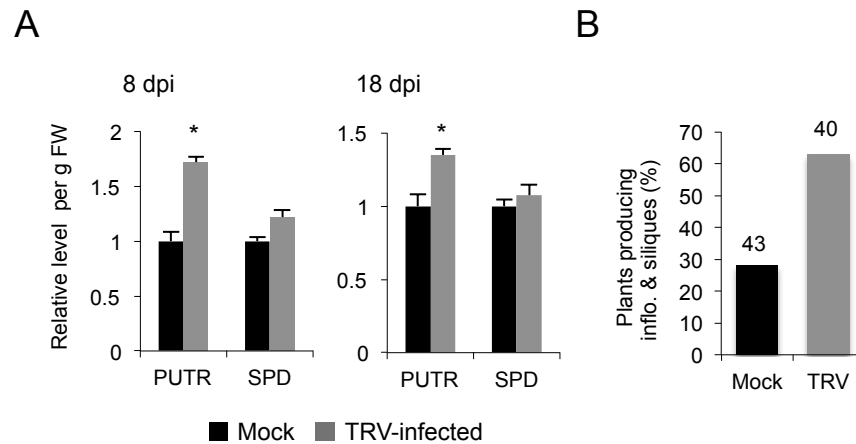

**Supplemental Figure S5.** Polyamine levels and tolerance to freezing. A, Relative levels of putrescine (PUTR) and spermedine (SPD) in mock-inoculated (black) (arbitrarily set at 1) and TRV-infected (grey) Arabidopsis leaves. Samples were collected at 8 and 18 dpi and metabolites were quantified by GC-MS. B, Percentage of mock-inoculated and TRV-infected Arabidopsis plants showing enhanced tolerance to freezing. The total number of tested plants is indicated above each bar. Tolerance was estimated as the number of plants producing inflorescences and siliques.
